# Supplementary material for: The Molecular Basis of Kale Domestication: Transcriptional Profiling of Developing Leaves Provides New Insights Into the Evolution of a Brassica oleracea Vegetative Morphotype
Source: Frontiers journal article supplement (doi:10.3389/fpls.2021.637115), 2021-03-05
Supplement: Data_Sheet_1.zip [file Data_Sheet_1.zip]

## Supplementary material

**Supplementary Table 1: Mapping Statistics**

| Sample    | Total Reads | Trimmed Reads | Uniquely Mapped | Percent Uniquely Mapped |
|-----------|-------------|---------------|-----------------|-------------------------|
| Kale 1    | 24535591    | 24516812      | 20190451        | 82.4%                   |
| Kale 2    | 20833408    | 20821507      | 16800807        | 80.7%                   |
| Kale 3    | 15736362    | 15700360      | 12410505        | 79.0%                   |
| Cabbage 1 | 9968261     | 9954978       | 8107108         | 81.4%                   |
| Cabbage 2 | 16648670    | 16624223      | 14775990        | 88.9%                   |
| TO1000 1  | 17083824    | 17002521      | 14426962        | 84.9%                   |
| TO1000 2  | 22918390    | 22886968      | 19362988        | 84.6%                   |
| TO10003   | 25192908    | 25120337      | 19637321        | 78.2%                   |

Find Supplementary tables at : <https://doi.org/10.6084/m9.figshare.13224383>

**Supplementary Table 2.** Kale vs. TO1000 differentially expressed genes.

**Supplementary Table 3.** Kale vs. Cabbage differentially expressed genes.

**Supplementary Table 4.** Cabbage vs. TO1000 differentially expressed genes.

**Supplementary Table 5.** Kale vs TO1000 Higher Expressed Genes Enriched GO terms.

**Supplementary Table 6.** Kale vs TO1000 Lower Expressed Genes Enriched GO terms.

**Supplementary Table 7.** Kale vs Cabbage Higher Expressed Genes Enriched GO terms.

**Supplementary Table 8.** Kale vs Cabbage Lower Expressed Genes Enriched GO terms.

**Supplementary Table 9.** Cabbage vs TO1000 Higher Expressed Genes Enriched GO terms.

**Supplementary Table 10.** Cabbage vs TO1000 Lower Expressed Genes Enriched GO terms.

**Supplementary Table 11.** Kale Shared (Kale vs TO1000 & Kale vs Cabbage) Higher Expressed Genes Enriched GO terms.

**Supplementary Table 12.** Kale Shared (Kale vs TO1000 & Kale vs Cabbage) Lower Expressed Genes Enriched GO terms.

**Supplementary Table 13.** Kale vs TO1000 Higher Expressed Genes Enriched KEGG Terms.

**Supplementary Table 14.** Kale vs TO1000 Lower Expressed Genes Enriched KEGG Terms.

**Supplementary Table 15.** Kale vs Cabbage Higher Expressed Genes Enriched KEGG Terms.

**Supplementary Table 16.** Kale vs Cabbage Lower Expressed Genes Enriched KEGG Terms.

**Supplementary Table 17.** Cabbage vs TO1000 Higher Expressed Genes Enriched KEGG Terms.

**Supplementary Table 18.** Cabbage vs TO1000 Lower Expressed Genes Enriched KEGG Terms.

**Supplementary Table 19.** Kale Shared (Kale vs TO1000 & Kale vs Cabbage) Higher Expressed Genes Enriched KEGG Terms.

**Supplementary Table 20.** Kale Shared (Kale vs TO1000 & Kale vs Cabbage) Lower Expressed Genes Enriched KEGG Terms.

**Supplementary Table 21.** Enriched Transcription Factor list for transcription factors that were exclusively expressed in kale or shared among the three morphotypes

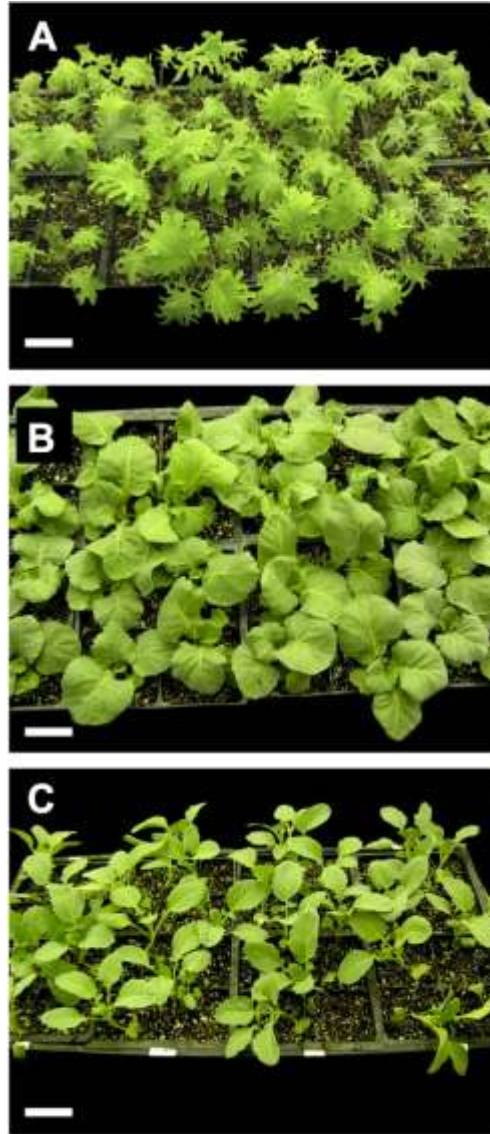

**Supplementary Figure 1.** Time point (24 days after planted )at which is morphotype was collecting during the RNAseq experiments. (A) red winter kale (*Brassica oleraceae* var. acephala *Red Winter*) with three to four fully expanded leaves. (B) cabbage PI 303629 South Africa (*B. oleracea* var. *capitata* with two to three fully expanded leaves. (C) TO1000 (*B. oleracea* var. *alboglabra*) three to five fully expanded leaves picture provided by Zachary Stansell. Scale bar = 10 cm

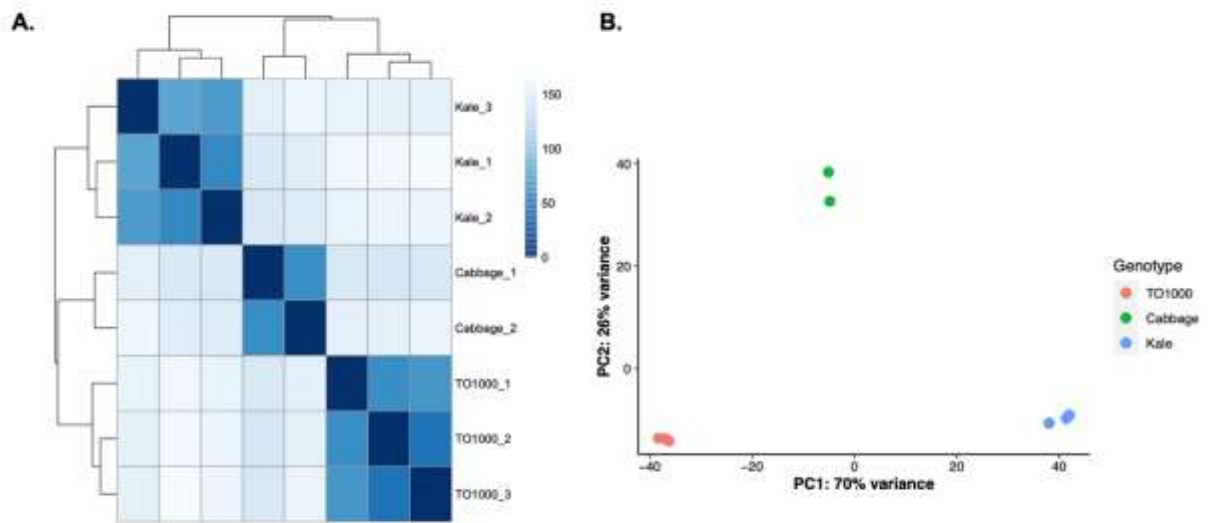

**Supplementary Figure 2.** Comparative summary statistics of the reference based assembly and data quality for each sample. A: Heat plot showing data quality and stronger correlations among samples belonging to the same morphotype. B: Percentage of variance among each condition and replicates.

A.

Kale vs TO1000 Higher Expressed Genes

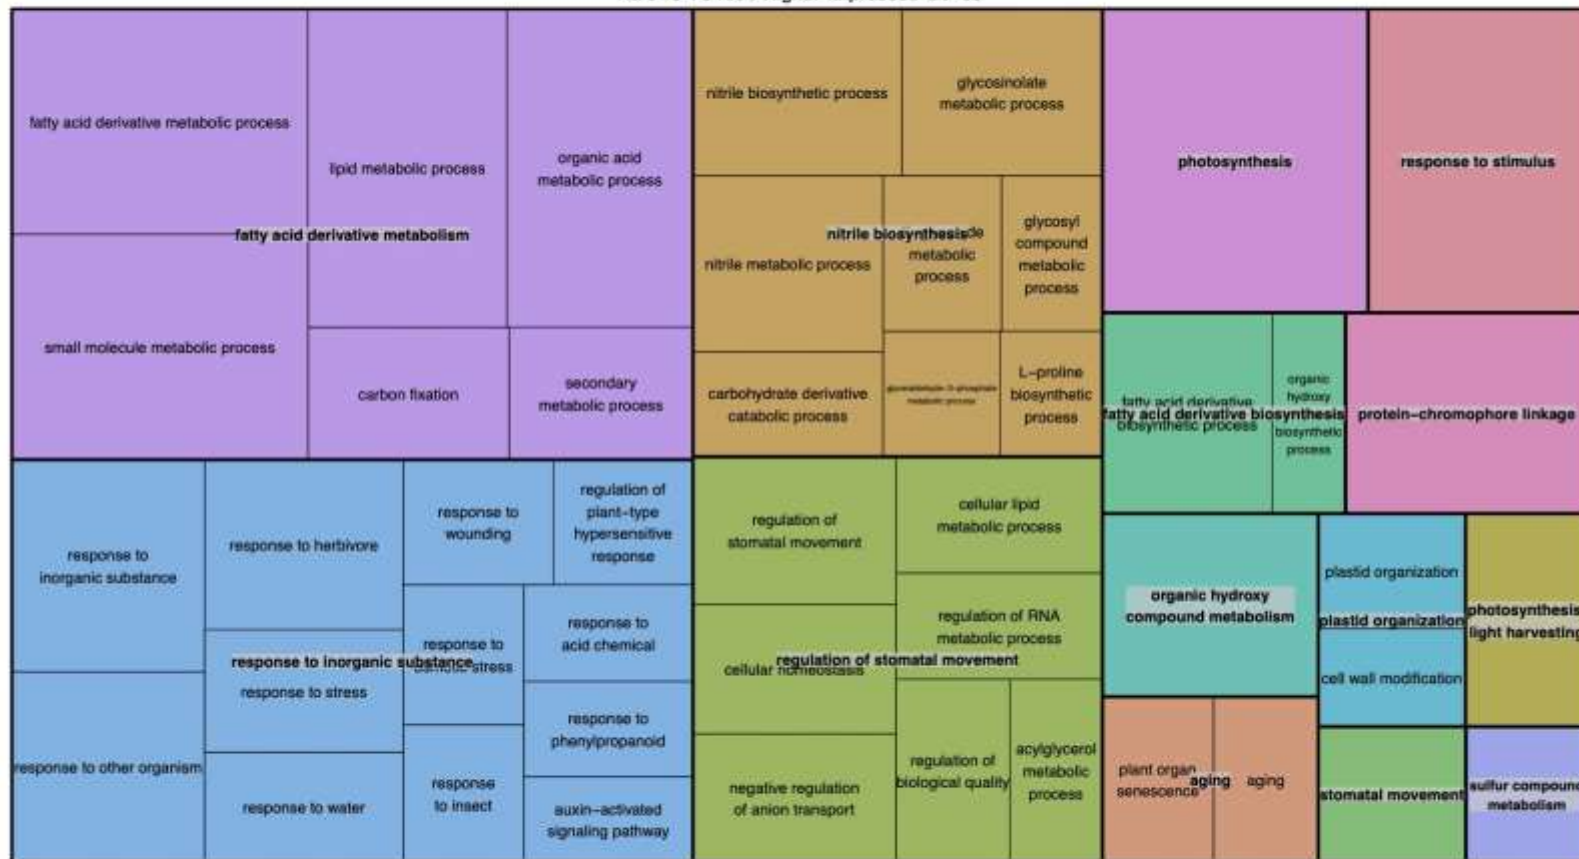

B.

Kale vs TO1000 Lower Expressed Genes

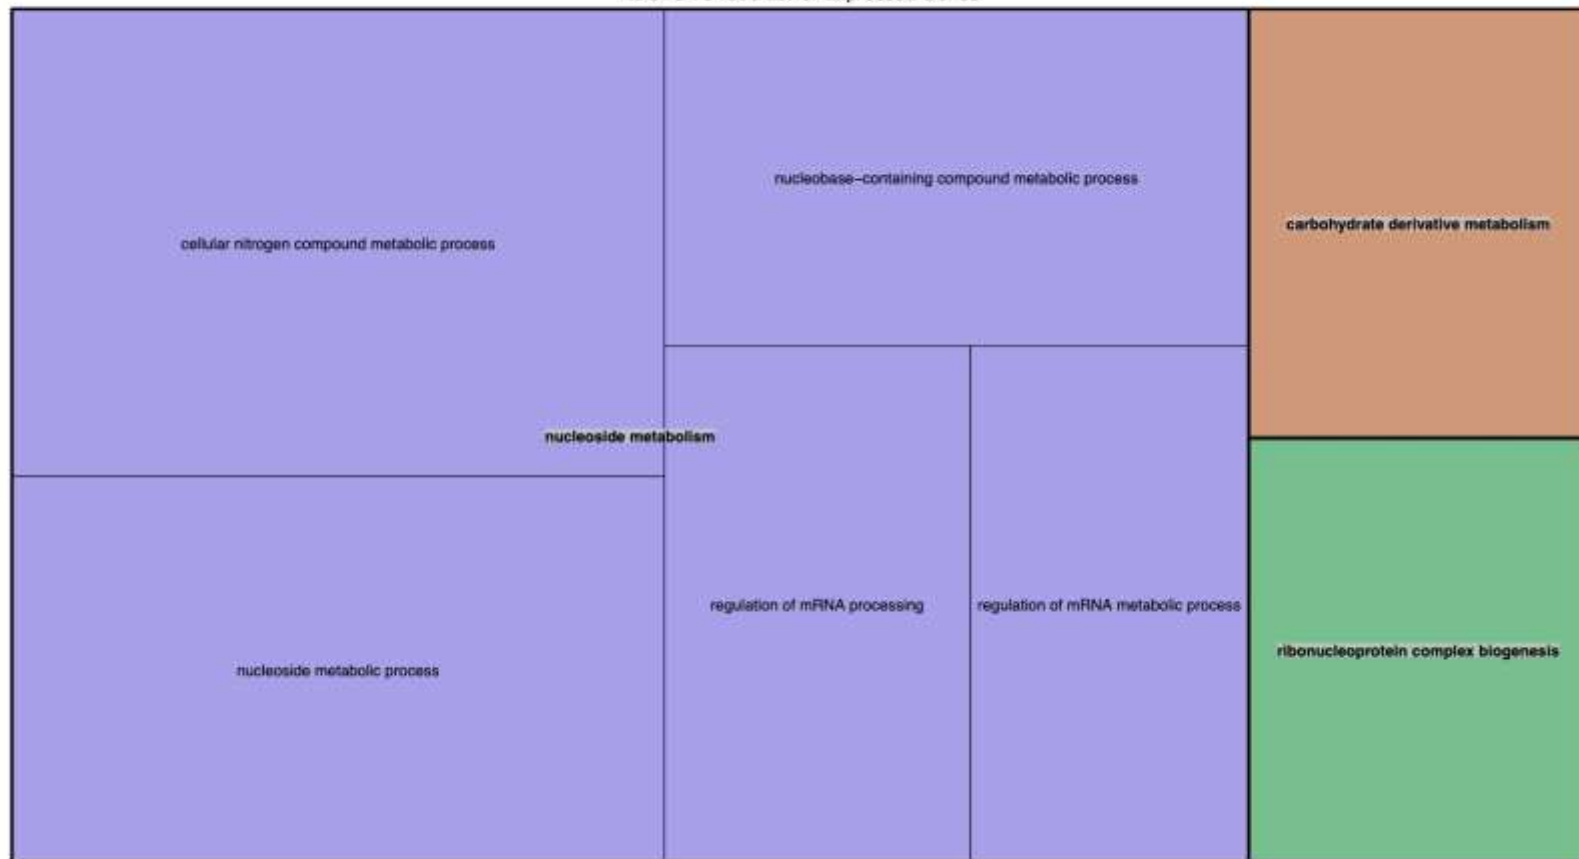

C.

Kale vs Cabbage Higher Expressed Genes

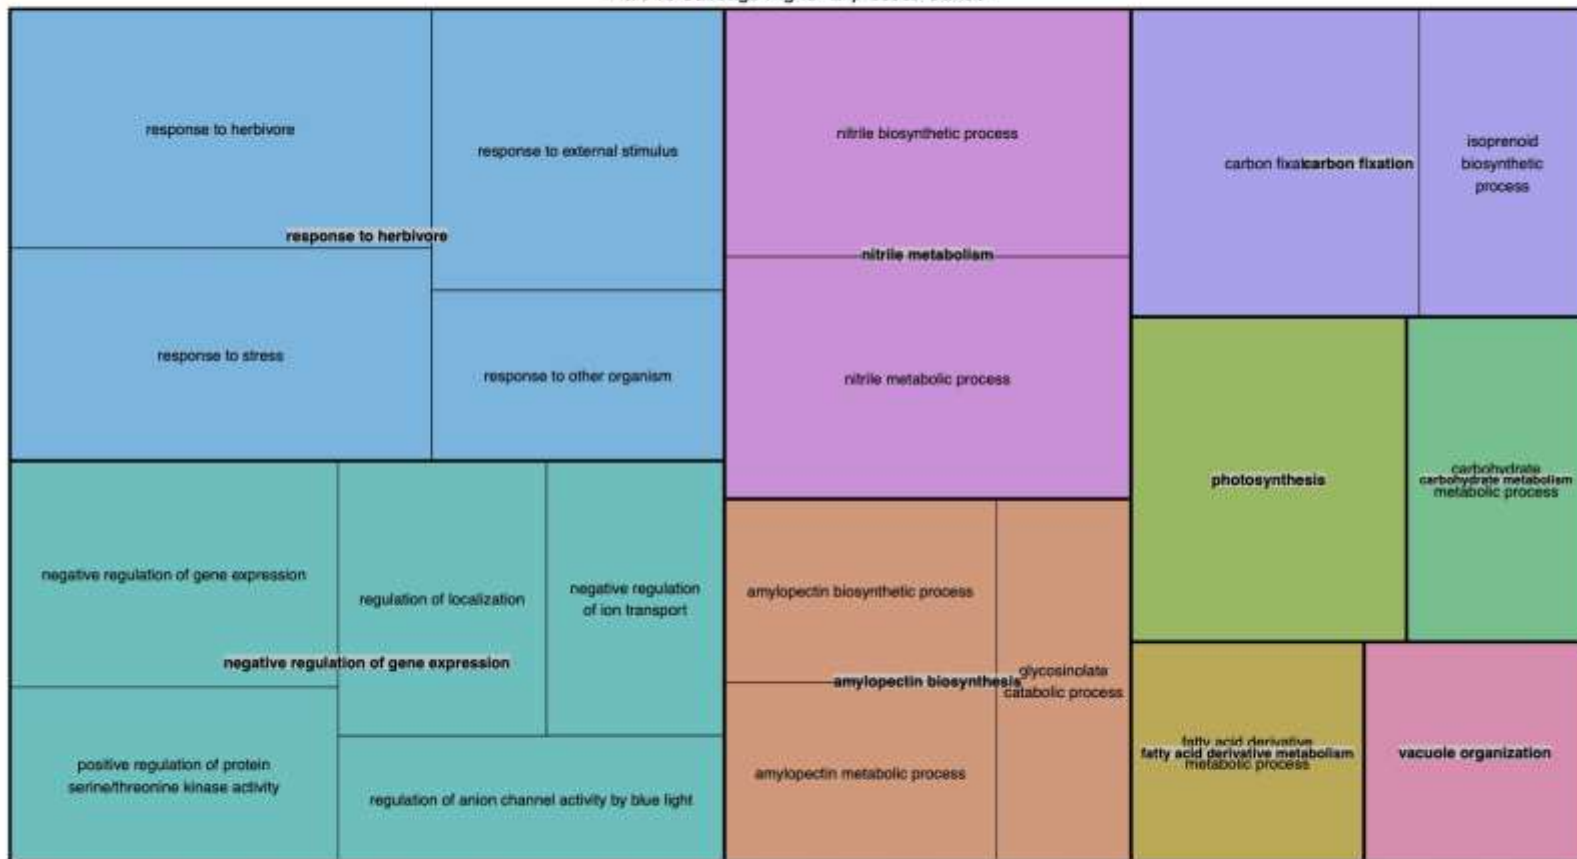

D.

Kale vs Cabbage Lower Expressed Genes

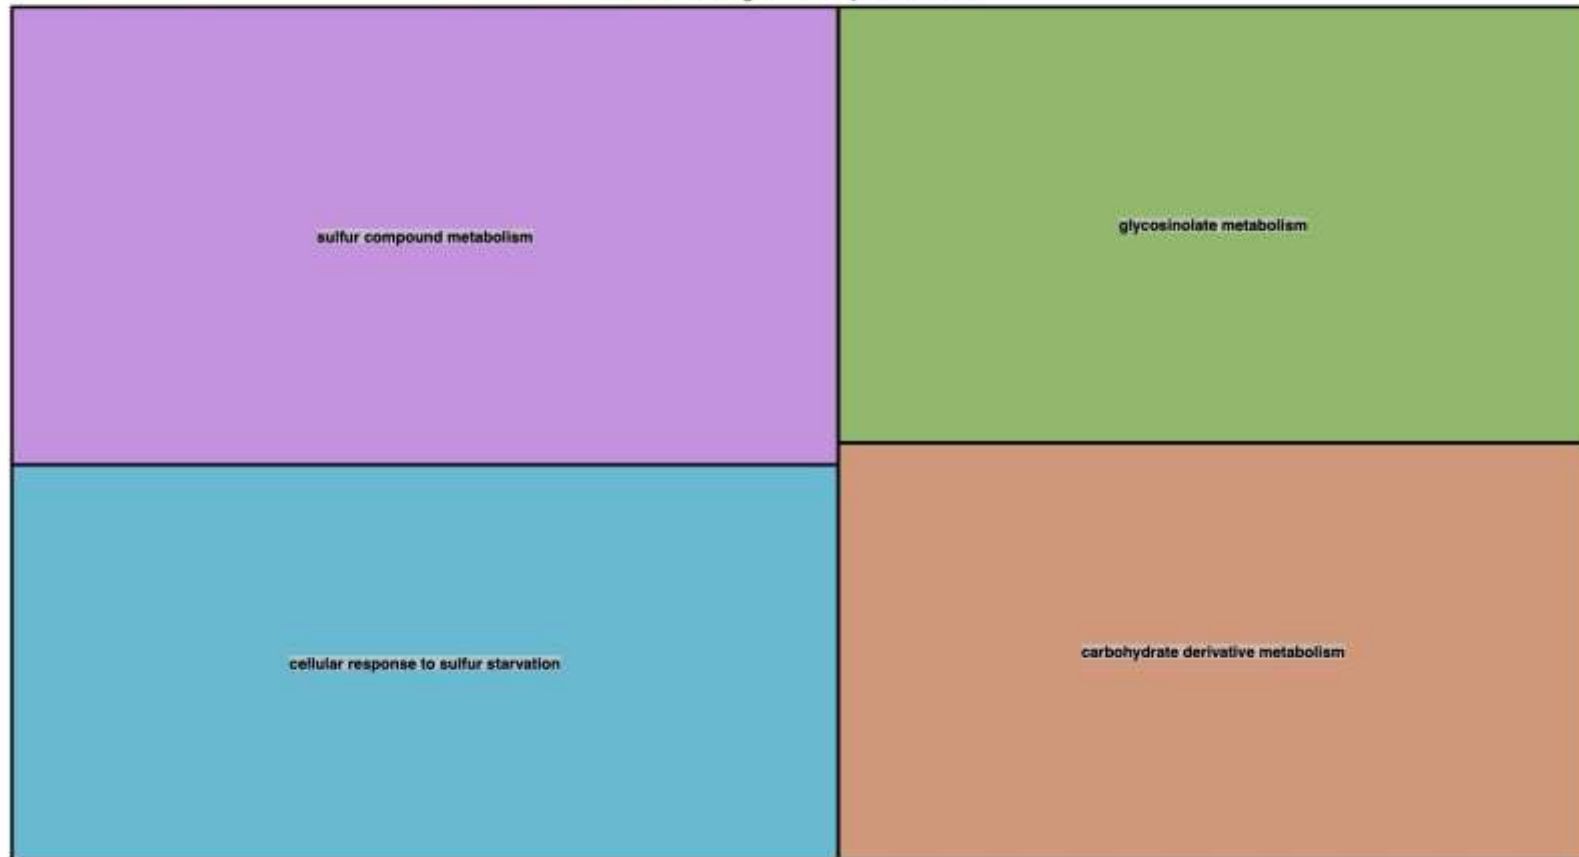

E.

Cabbage vs TO1000 Higher Expressed Genes

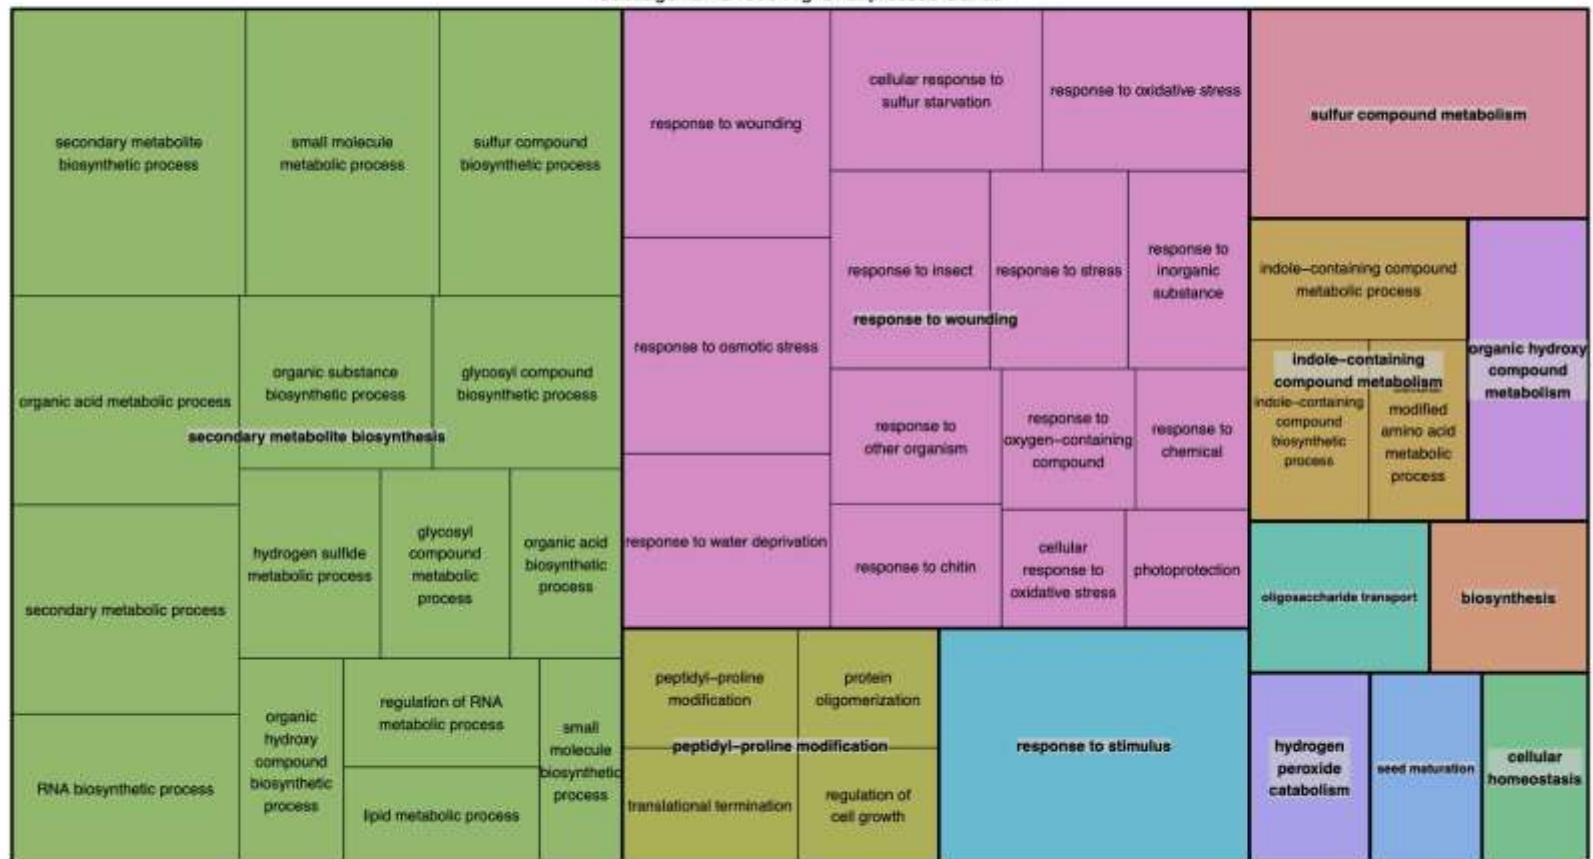

F.

Cabbage vs TO1000 Lower Expressed Genes

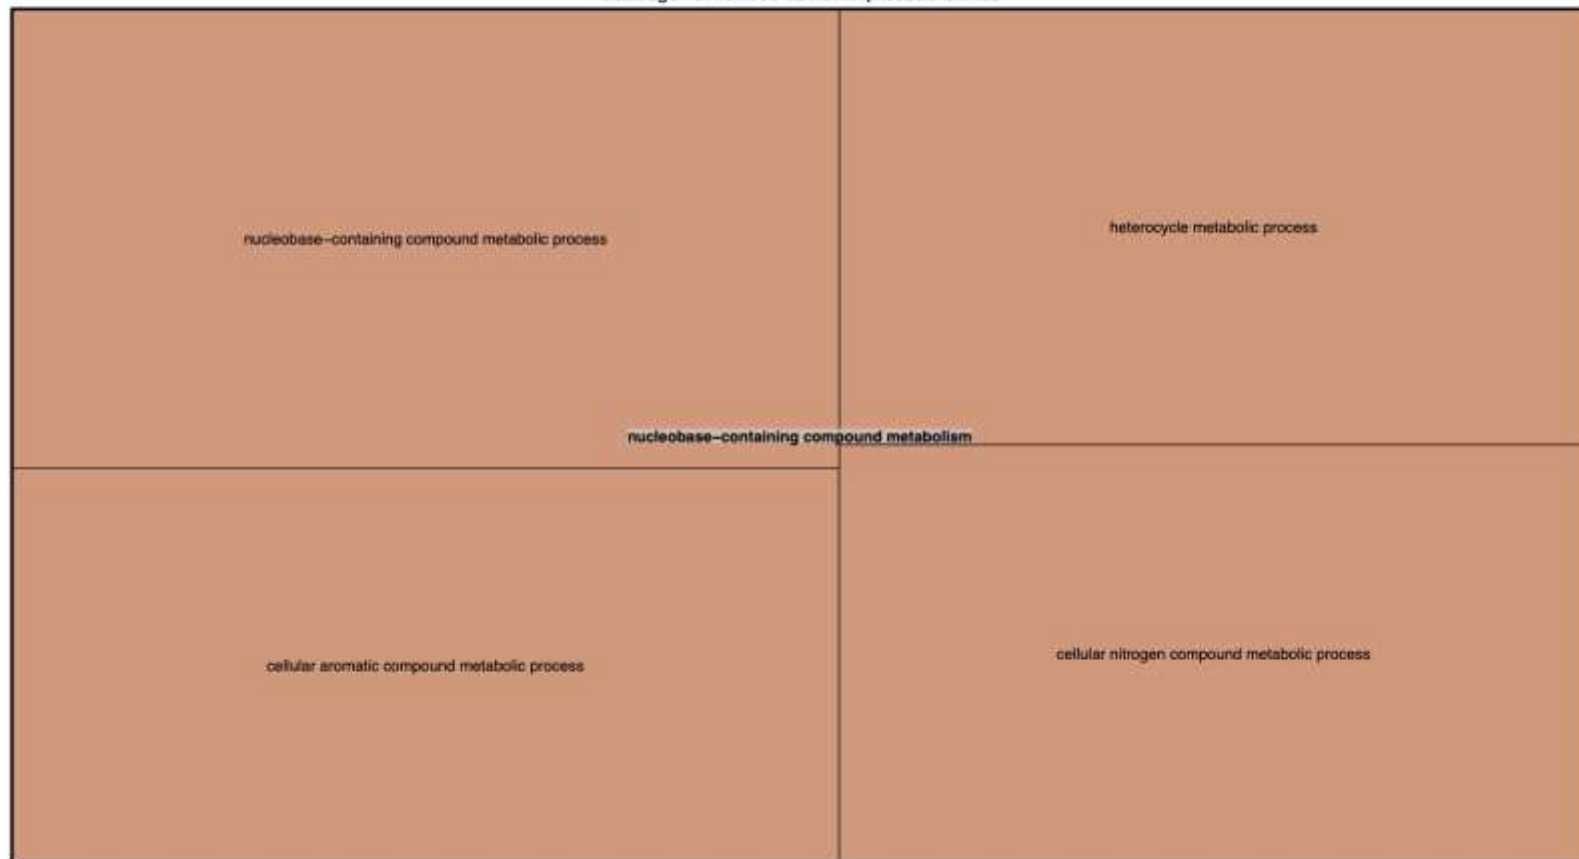

G.

Kale Shared Higher Expressed Genes

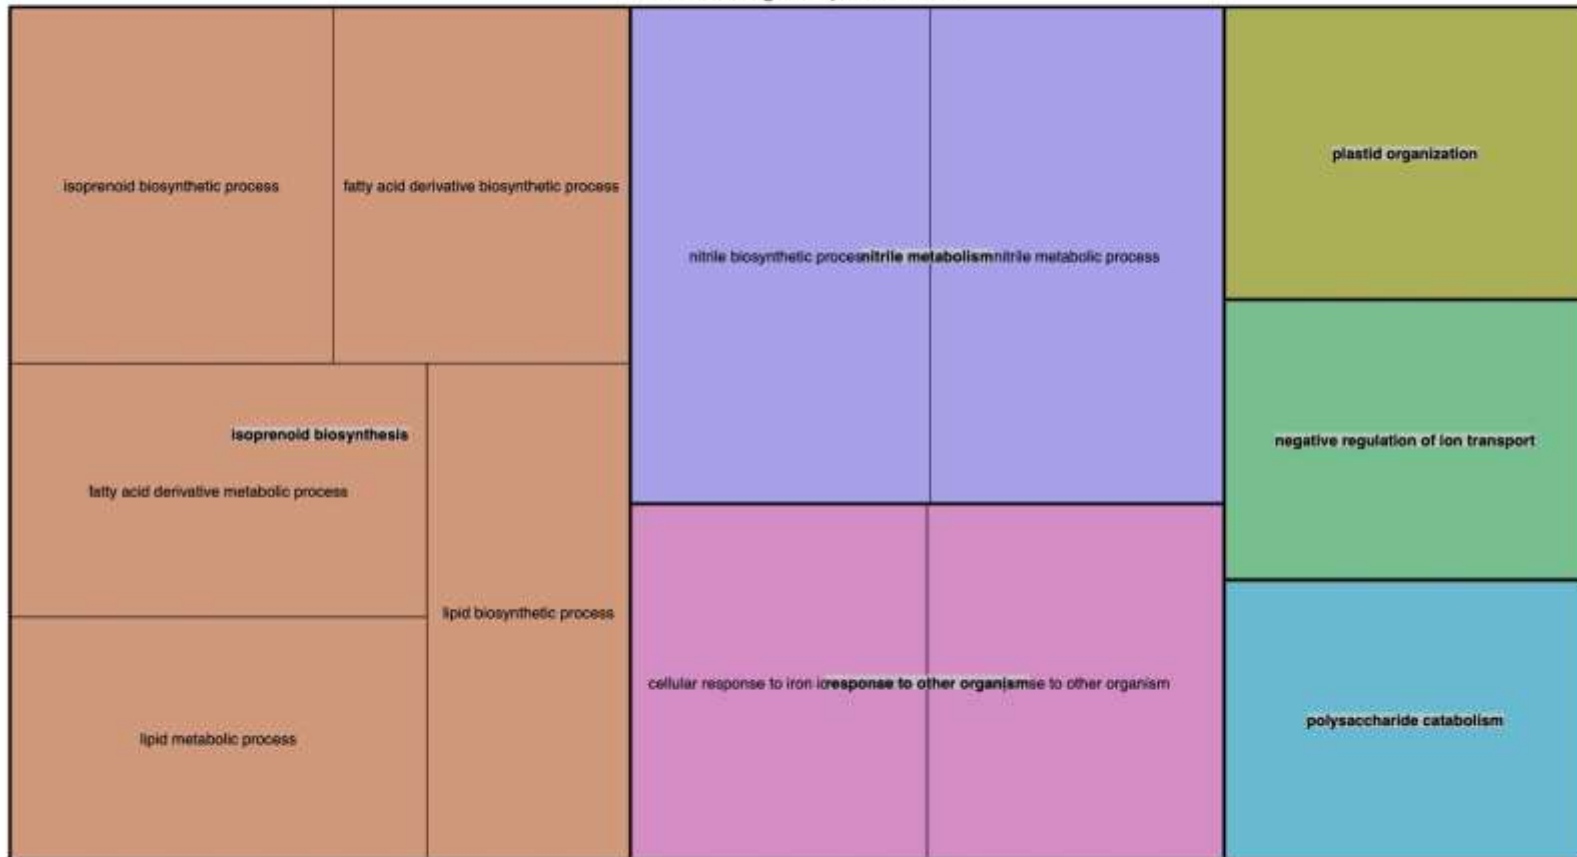

**Supplementary figure 3.** REVIGO treemaps summarizing gene ontology categories over-represented in kale leaves and meristems tissues. For comparisons between TO1000, cabbage and kale and separating lower and higher expressed genes. A. Kale vs TO100 higher expressed genes; B. Kale vs TO1000 lower expressed genes; C. Kale vs cabbage higher expressed genes; D. Kale vs cabbage lower expressed genes E. Cabbage vs TO1000 higher expressed genes F. Cabbage vs TO1000 lower expressed genes G. Kale shared higher expressed genes
